# Supplementary material for: Cell cycle defects underlie childhood-onset cardiomyopathy associated with Noonan syndrome
Source: PubMed Central journal article supplement — iScience. 2021 Dec 9;25(1):103596. doi: 10.1016/j.isci.2021.103596 (PMC8704485; doi:10.1016/j.isci.2021.103596), 2021-12-09
Supplement: mmc1.pdf [file mmc1.pdf]

**Supplemental information**

**Cell cycle defects underlie  
childhood-onset cardiomyopathy  
associated with Noonan syndrome**

**Anna B. Meier, Sarala Raj Murthi, Hilansi Rawat, Christopher N. Toepfer, Gianluca Santamaria, Manuel Schmid, Elisa Mastantuono, Thomas Schwarzmayer, Riccardo Berutti, Julie Cleuziou, Peter Ewert, Agnes Görlach, Karin Klingel, Karl-Ludwig Laugwitz, Christine E. Seidman, Jonathan G. Seidman, Alessandra Moretti, and Cordula M. Wolf**

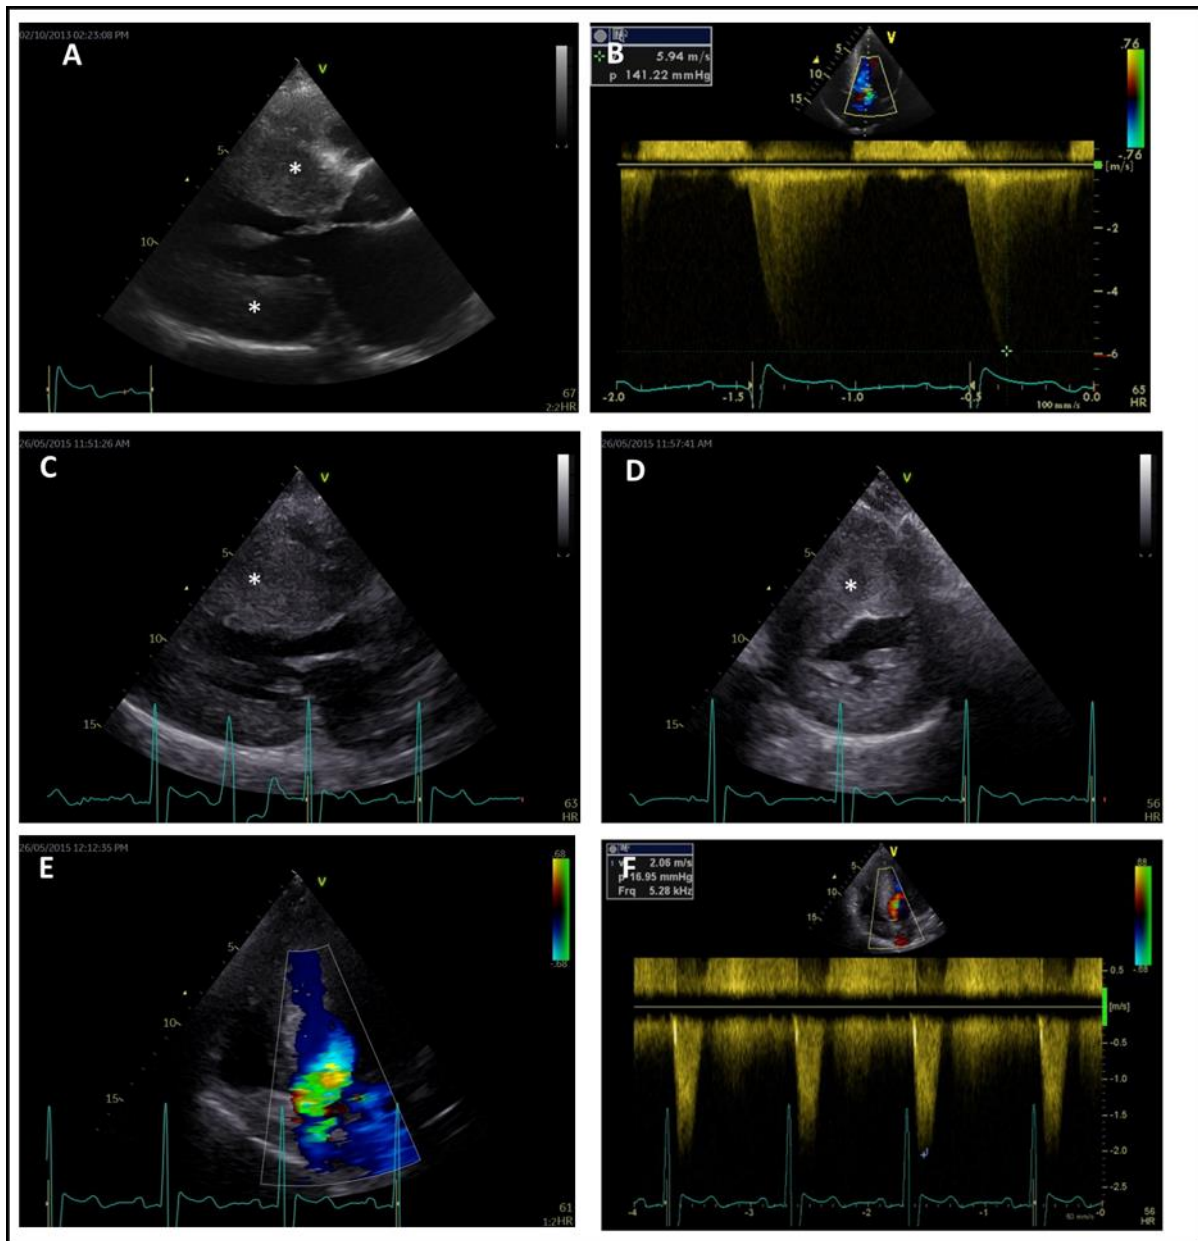

**Figure S1. Echocardiographic images of patient 1, Related to Figure 1.** Transthoracic echocardiographic imaging of patient 1 (Noonan syndrome, *RAF1*, male, 165 months of age) at the time of admission to the hospital for surgical left ventricular outflow tract resection (panel A and B), and at the time of follow-up (184 months of age, panel C, D, E and F). Depicted are the parasternal long axis view (panel A and C), parasternal short axis view (panel D), and the apical 5-chamber view (panel B and E) with color Doppler (panel E) and continuous wave (CW) Doppler (panel B and D) imaging. There is severe myocardial thickening (\*), the peak gradient over the left ventricular outflow tract measures 130 mmHg before resection of the left ventricular outflow tract (panel B). There is no obstruction of the left ventricular outflow tract at the time of follow-up (panel F).

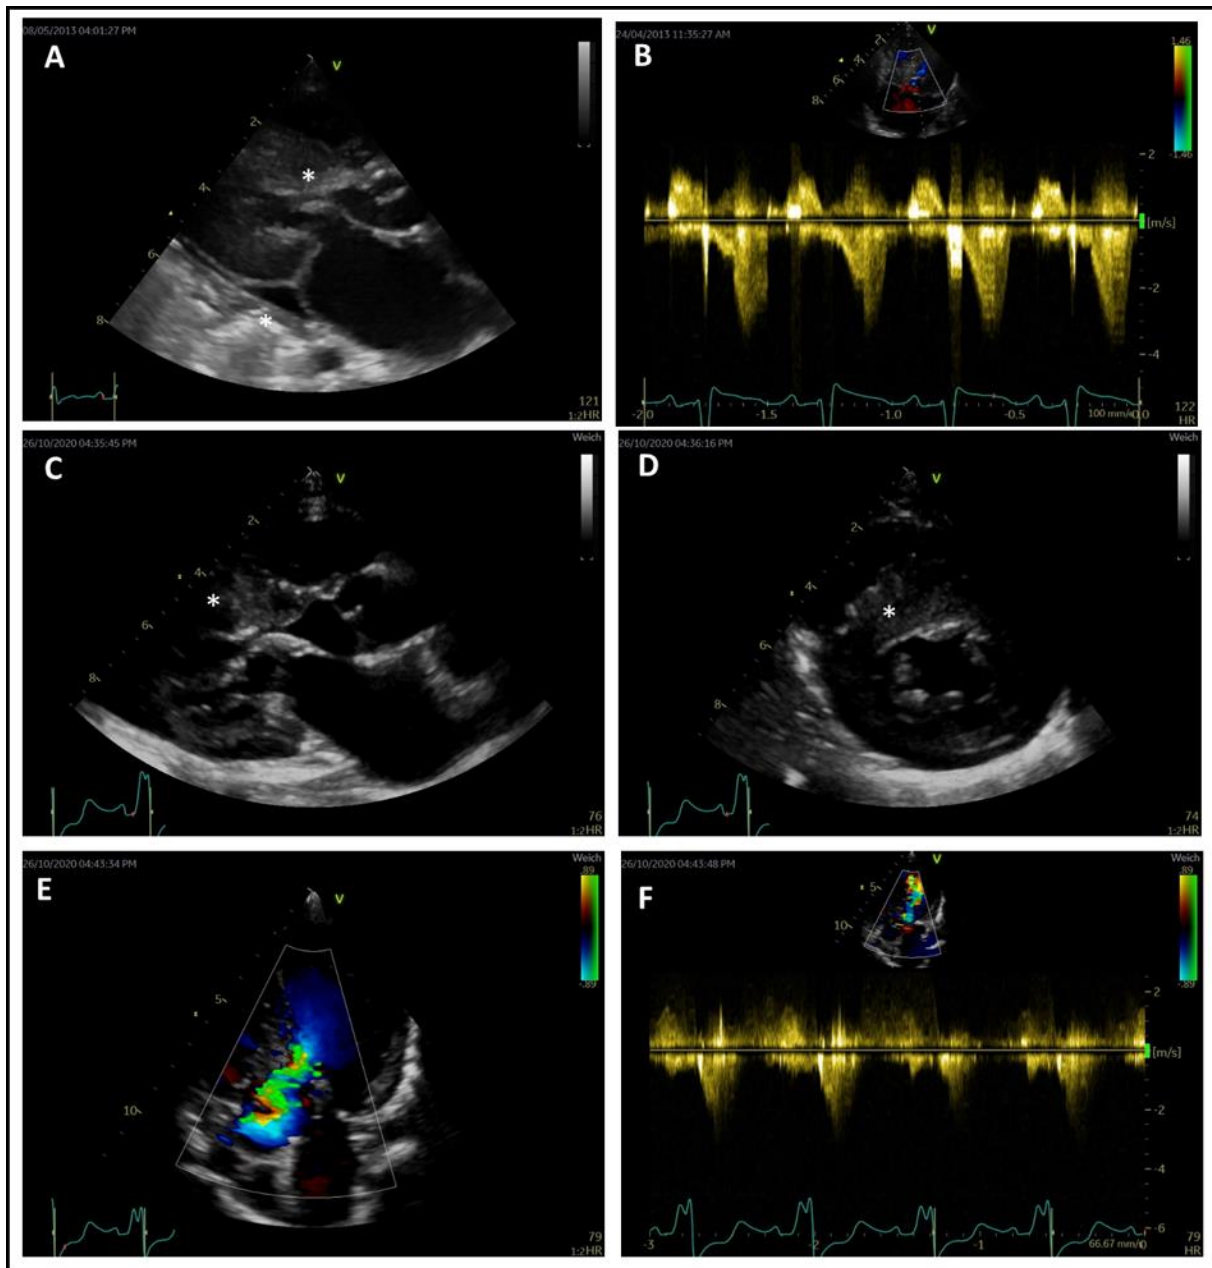

**Figure S2. Echocardiographic images of patient 2, Related to Figure 1.** Transthoracic echocardiographic imaging of patient 2 (Noonan syndrome, *RAF1*, female, 12 months of age) at the time of admission to the hospital for surgical left ventricular outflow tract resection (panel A and B), and at the time of follow-up (101 months of age, panel C, D, E and F). Depicted are the parasternal long axis view (panel A and C), parasternal short axis view (panel D), and the apical 5-chamber view (panel B and E) with color Doppler (panel E) and continuous wave (CW) Doppler (panel B and D) imaging. There is severe myocardial thickening (\*), the peak gradient over the left ventricular outflow tract measures 75 mmHg before resection of the left ventricular outflow tract (panel B), and 40 mmHg at the time of follow-up (panel F).

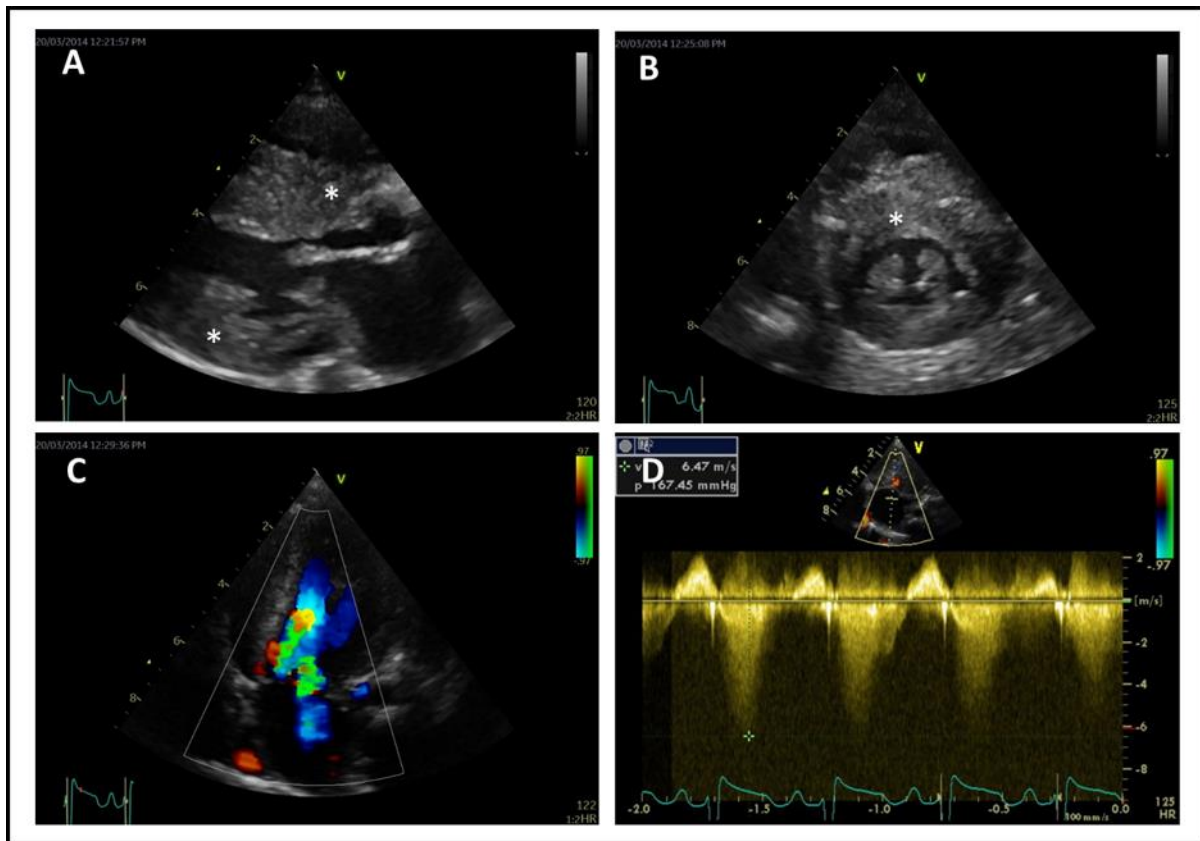

**Figure S3. Echocardiographic images of patient 3, Related to Figure 1.** Transthoracic echocardiographic imaging of patient 3 (Noonan syndrome, *RAF1*, male, 11 months of age) at the time of admission to the hospital for surgical left ventricular outflow tract resection. Depicted are the parasternal long axis view (panel A), parasternal short axis view (panel B), and the apical 5-chamber view (panel C and D) with color Doppler (panel C) and continuous wave (CW) Doppler (panel D) imaging. There is severe myocardial thickening (\*), the peak gradient over the left ventricular outflow tract measures 130 mmHg.

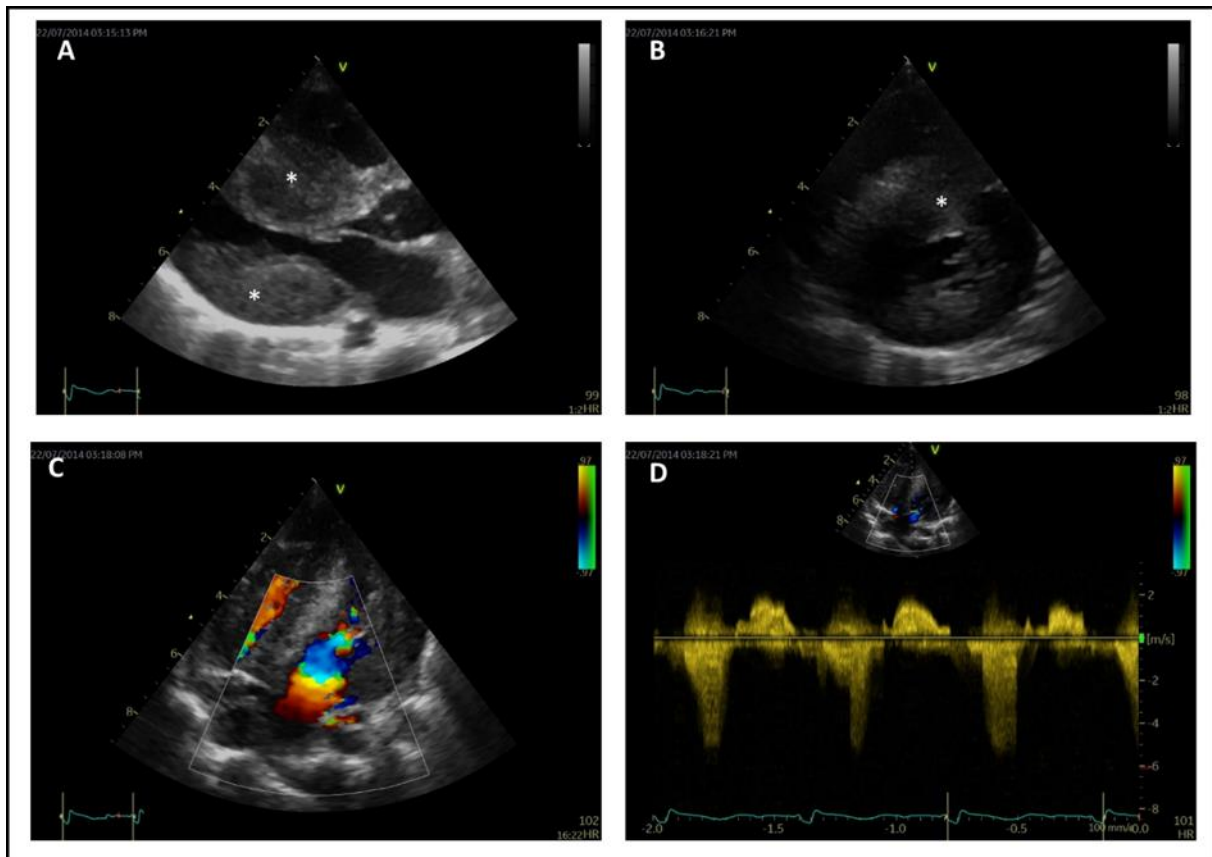

**Figure S4. Echocardiographic images of patient 4, Related to Figure 1.** Transthoracic echocardiographic imaging of patient 4 (Noonan syndrome, *PTPN11*, female, age 13 months) at the time of admission to the hospital for surgical left ventricular outflow tract resection. Depicted are the parasternal long axis view (panel A), parasternal short axis view (panel B), and the apical 5-chamber view (panel C and D) with color Doppler (panel C) and continuous wave (CW) Doppler (panel D) imaging. There is severe myocardial thickening (\*), the peak gradient over the left ventricular outflow tract measures 72 mmHg.

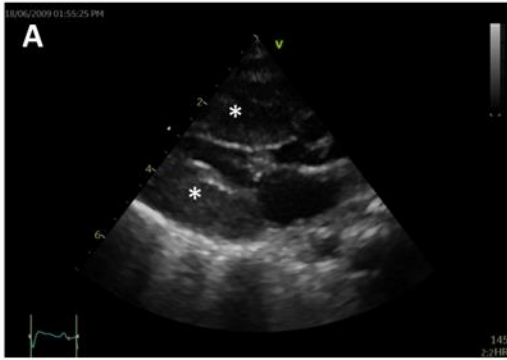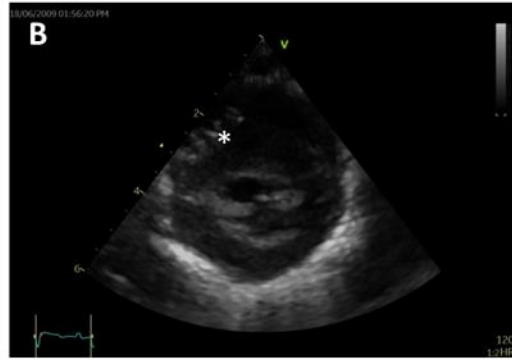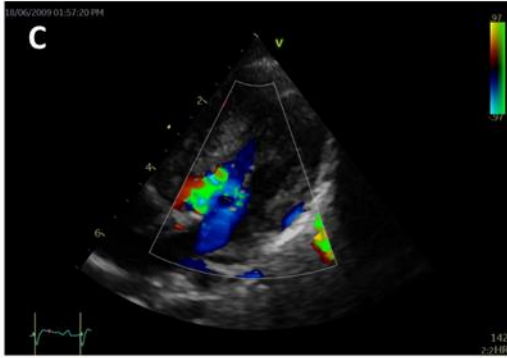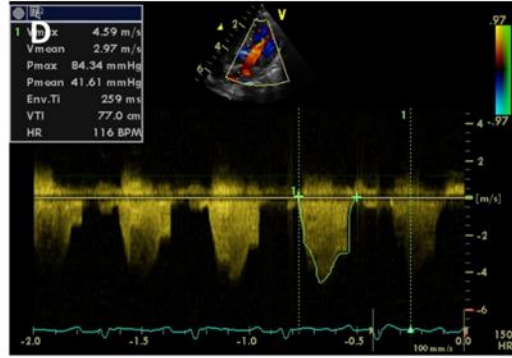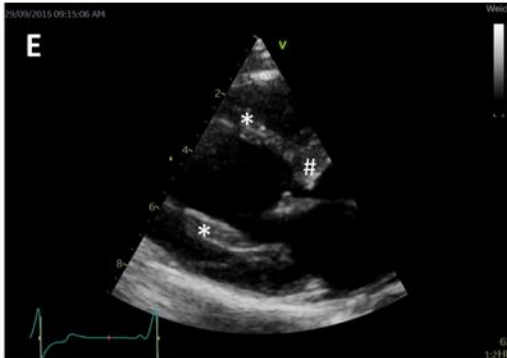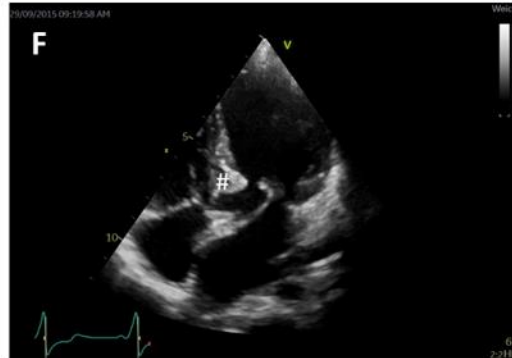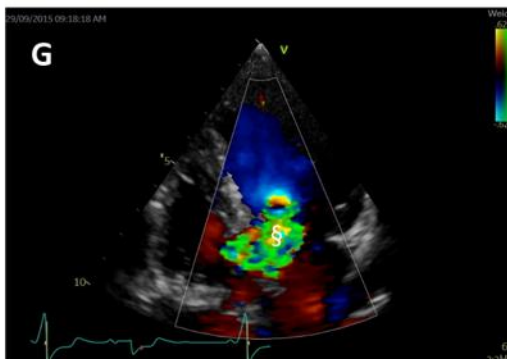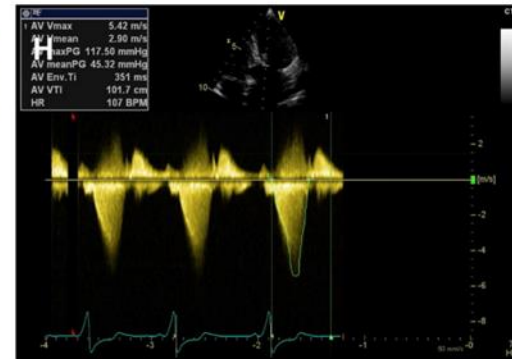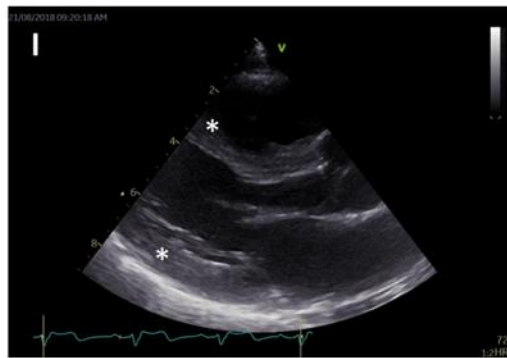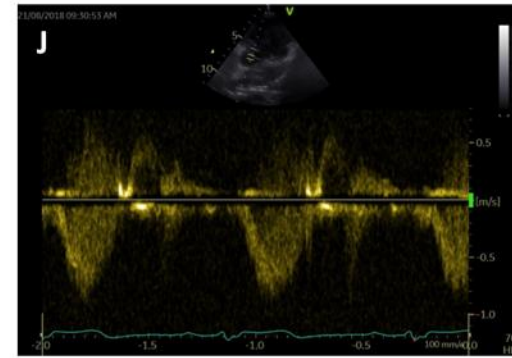

**Figure S5. Echocardiographic images of patient 5, Related to Figure 1.** Transthoracic echocardiographic imaging of patient 5 (Noonan syndrome, *PTPN11*, male, 2 months of age) at the time of admission to the hospital for surgical left ventricular outflow tract resection (panel A – D). Depicted are the parasternal long axis view (panel A), parasternal short axis view (panel B), and the apical 5-chamber view (panel C and D) with color Doppler (panel C) and continuous wave (CW) Doppler (panel D) imaging. There is severe myocardial thickening (\*), the peak gradient over the left ventricular outflow tract measures 85 mmHg. At 76 months of age (panel E – H), myocardial hypertrophy was much less pronounced (\* in panel E), but there was a remaining spur in the left ventricular outflow tract below the aortic valve (# in panel F) causing a localized obstruction (§ in panel G) with a gradient of up to 118 mmHg (panel H). The patient underwent a second surgical resection of this left ventricular outflow tract spur at this point. Follow-up at 109 months of age showed enddiastolic myocardial wall thickness z-score within the normal range and no outflow tract obstruction (panel I and J).



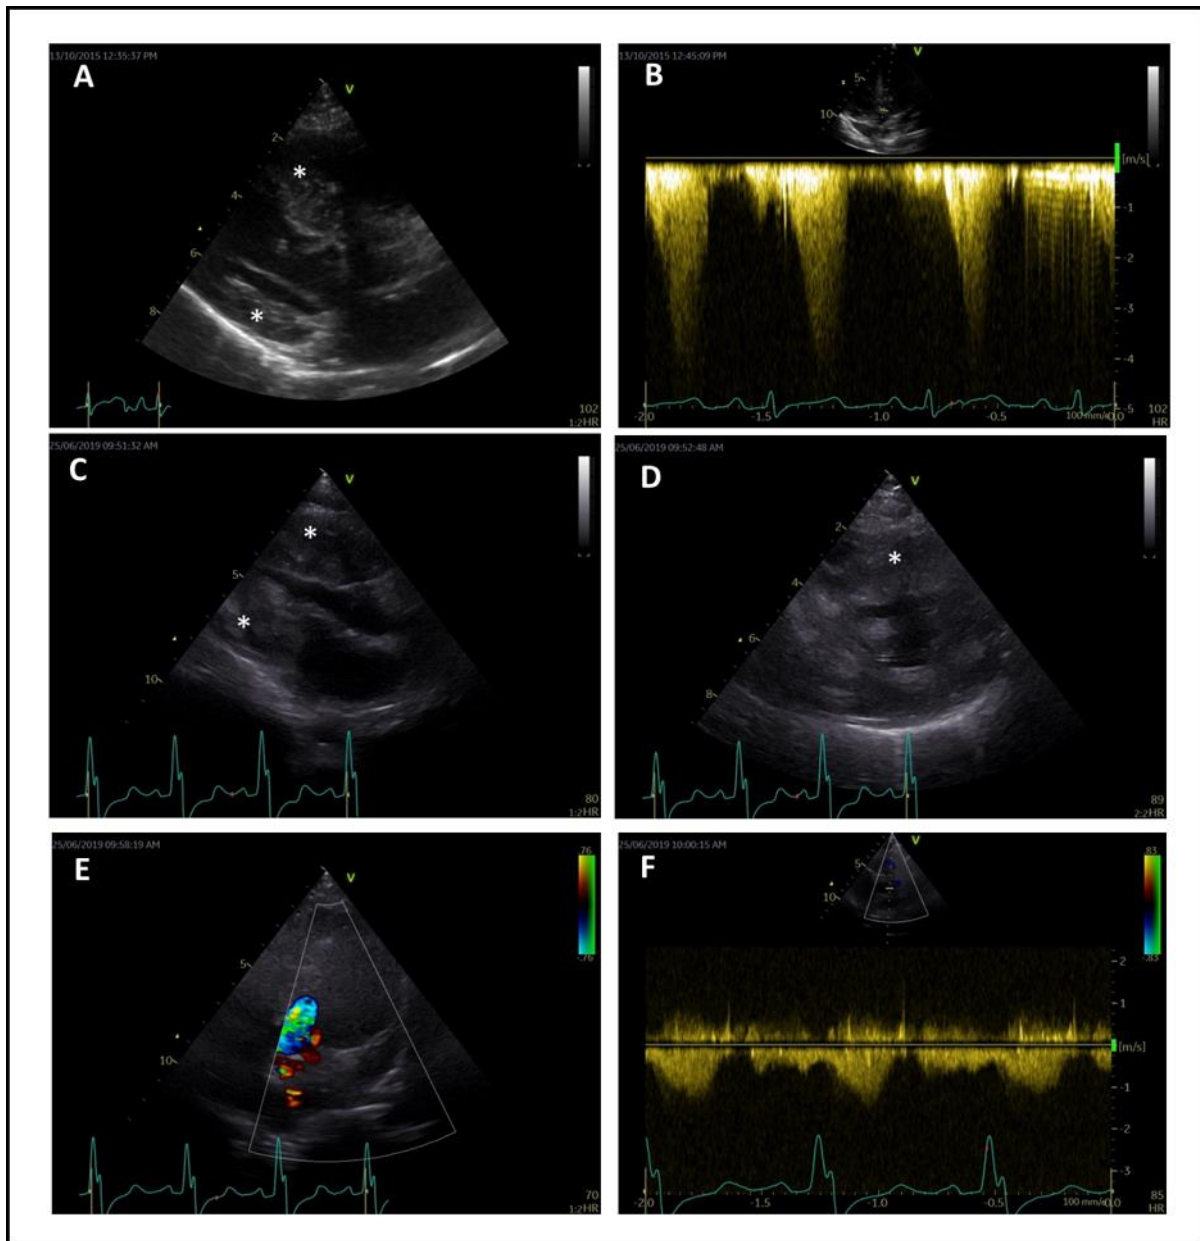

**Figure S6. Echocardiographic images of patient 6, Related to Figure 1.** Transthoracic echocardiographic imaging of patient 6 (Noonan syndrome, *RAF1*, female, 34 months of age) at the time of admission to the hospital for surgical left ventricular outflow tract resection (panel A and B), and at the time of follow-up (78 months of age, panel C, D, E and F). Depicted are the parasternal long axis view (panel A and C), parasternal short axis view (panel D), and the apical 5-chamber view (panel B and E) with color Doppler (panel E) and continuous wave (CW) Doppler (panel B and D) imaging. There is severe myocardial thickening (\*), the peak gradient over the left ventricular outflow tract measures 92 mmHg before resection of the left ventricular outflow tract (panel B). There is no obstruction of the left ventricular outflow tract at the time of follow-up (panel F).



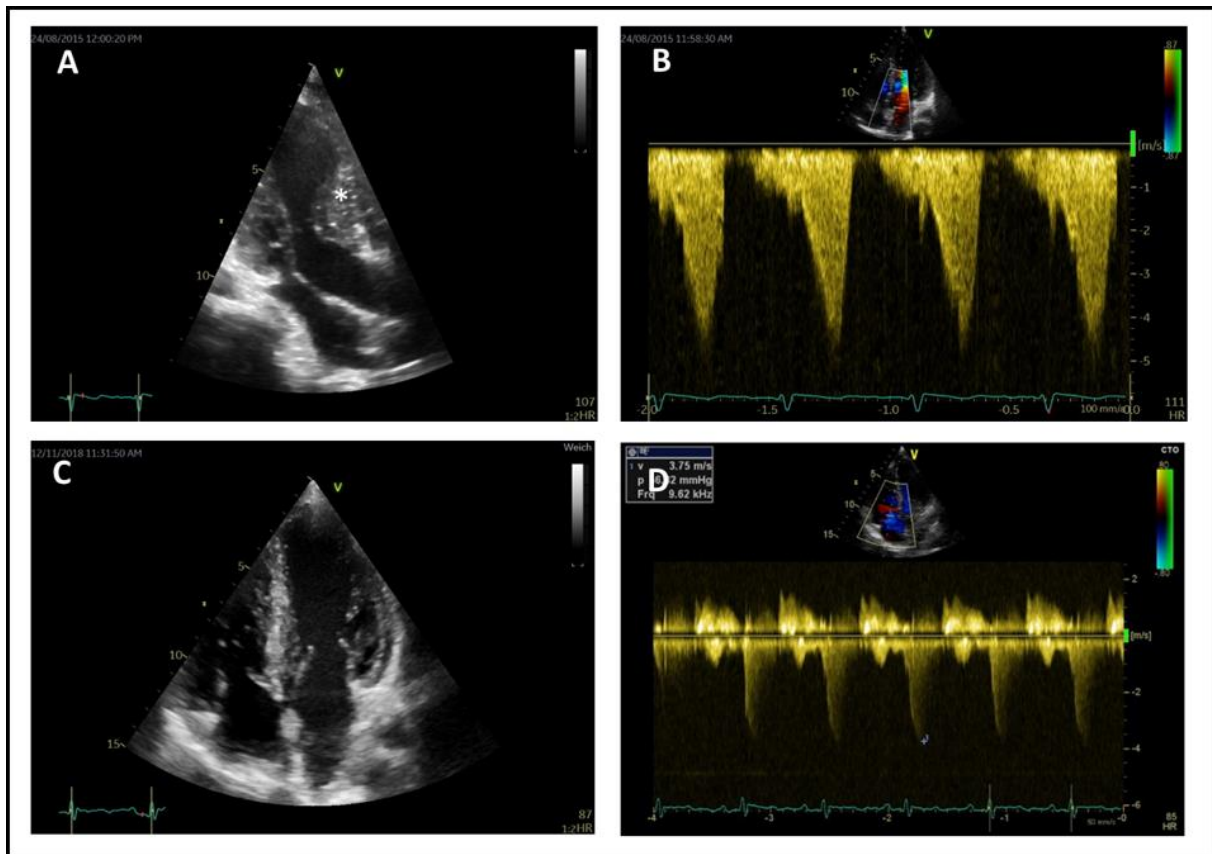

**Figure S7. Echocardiographic images of patient 7, Related to Figure 1.** Transthoracic echocardiographic imaging of patient 7 (Noonan syndrome, *PTPN11*, male, 182 months of age) at the time of admission to the hospital for surgical left ventricular outflow tract resection (panel A and B), and at the time of follow-up (220 months of age, panel C and D). Depicted are the apical 3-chamber view (panel A), the apical 4-chamber view (panel C), and the apical 5-chamber view with continuous wave (CW) Doppler (panel B and D) imaging. There is severe myocardial thickening (\*), the peak gradient over the left ventricular outflow tract measures 105 mmHg before resection of the left ventricular outflow tract (panel B). There is reduced obstruction of the left ventricular outflow tract at the time of follow-up (panel D).

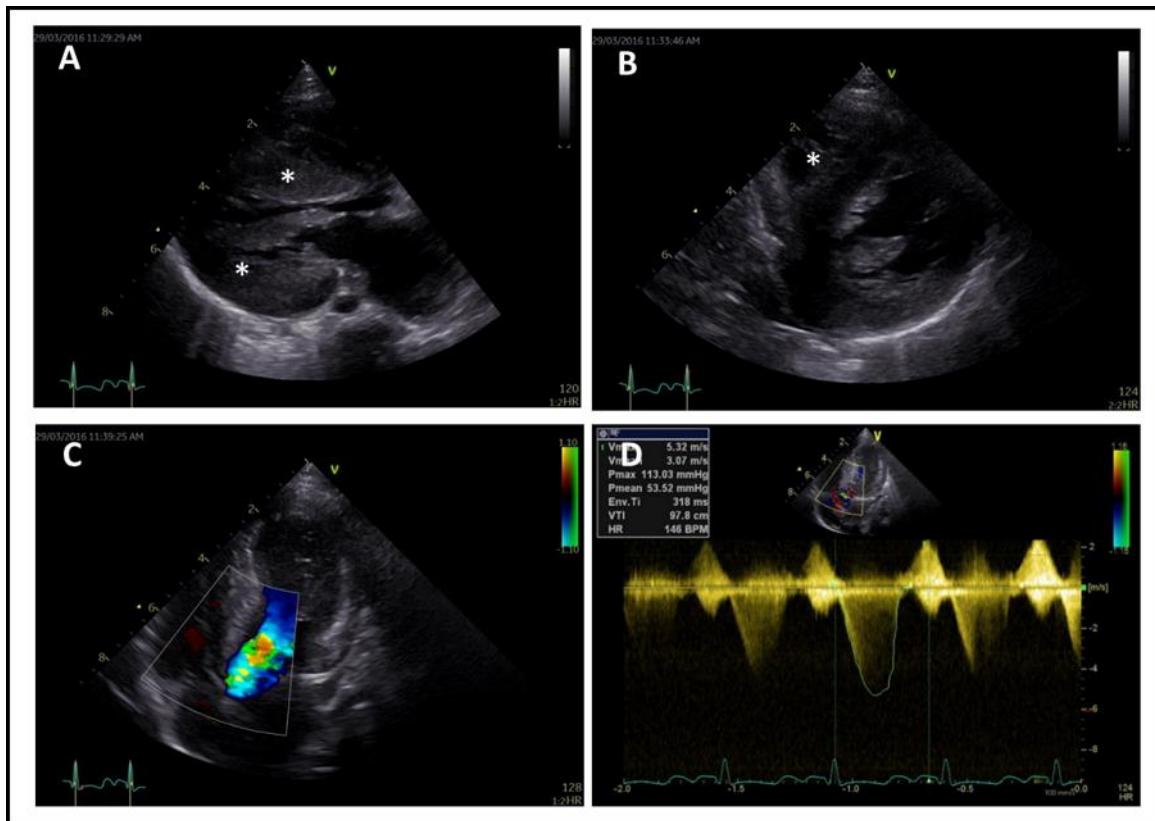

**Figure S8. Echocardiographic images of patient 8, Related to Figure 1.** Transthoracic echocardiographic imaging of patient 8 (Noonan syndrome, *RAF1*, female, 12 months of age) at the time of admission to the hospital for surgical left ventricular outflow tract resection. Depicted are the parasternal long axis view (panel A), parasternal short axis view (panel B), and the apical 5-chamber view (panel C and D) with color Doppler (panel C) and continuous wave (CW) Doppler (panel D) imaging. There is severe myocardial thickening (\*), the peak gradient over the left ventricular outflow tract measures 140 mmHg.

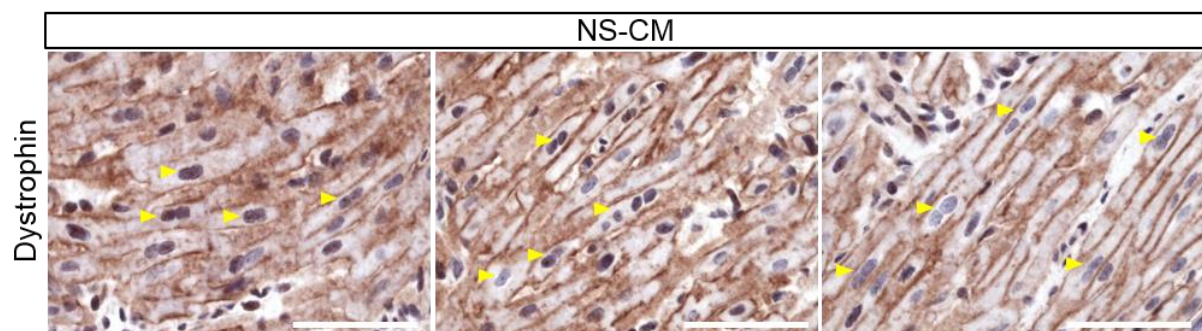

**Figure S9. Histological analysis of NS-CM patients LV myocardial tissue, Related to Figure 1.** Representative images of LV myocardial tissue from NS-CM patients stained for dystrophin to mark the plasma membrane of cardiomyocytes. Yellow arrowheads indicate examples of multinucleation. Scale bars = 25  $\mu$ m.

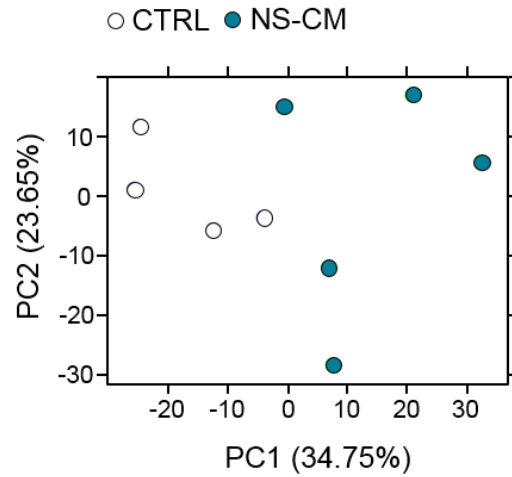

**Figure S10. Principal component analysis of NS-CM patients left ventricular myocardial tissue, Related to Figure 2.** Principal component analysis of RNA sequencing data of left ventricular (LV) myocardial tissue collected during septal myectomy from patients with Noonan syndrome-associated hypertrophic cardiomyopathy (NS-CM; mutated *PTPN11* N = 2 patients; mutated *RAF1* N = 3) or during ventricular septal defect repair surgery from otherwise healthy pediatric patients (CTRL; N = 4). PC = principal component.

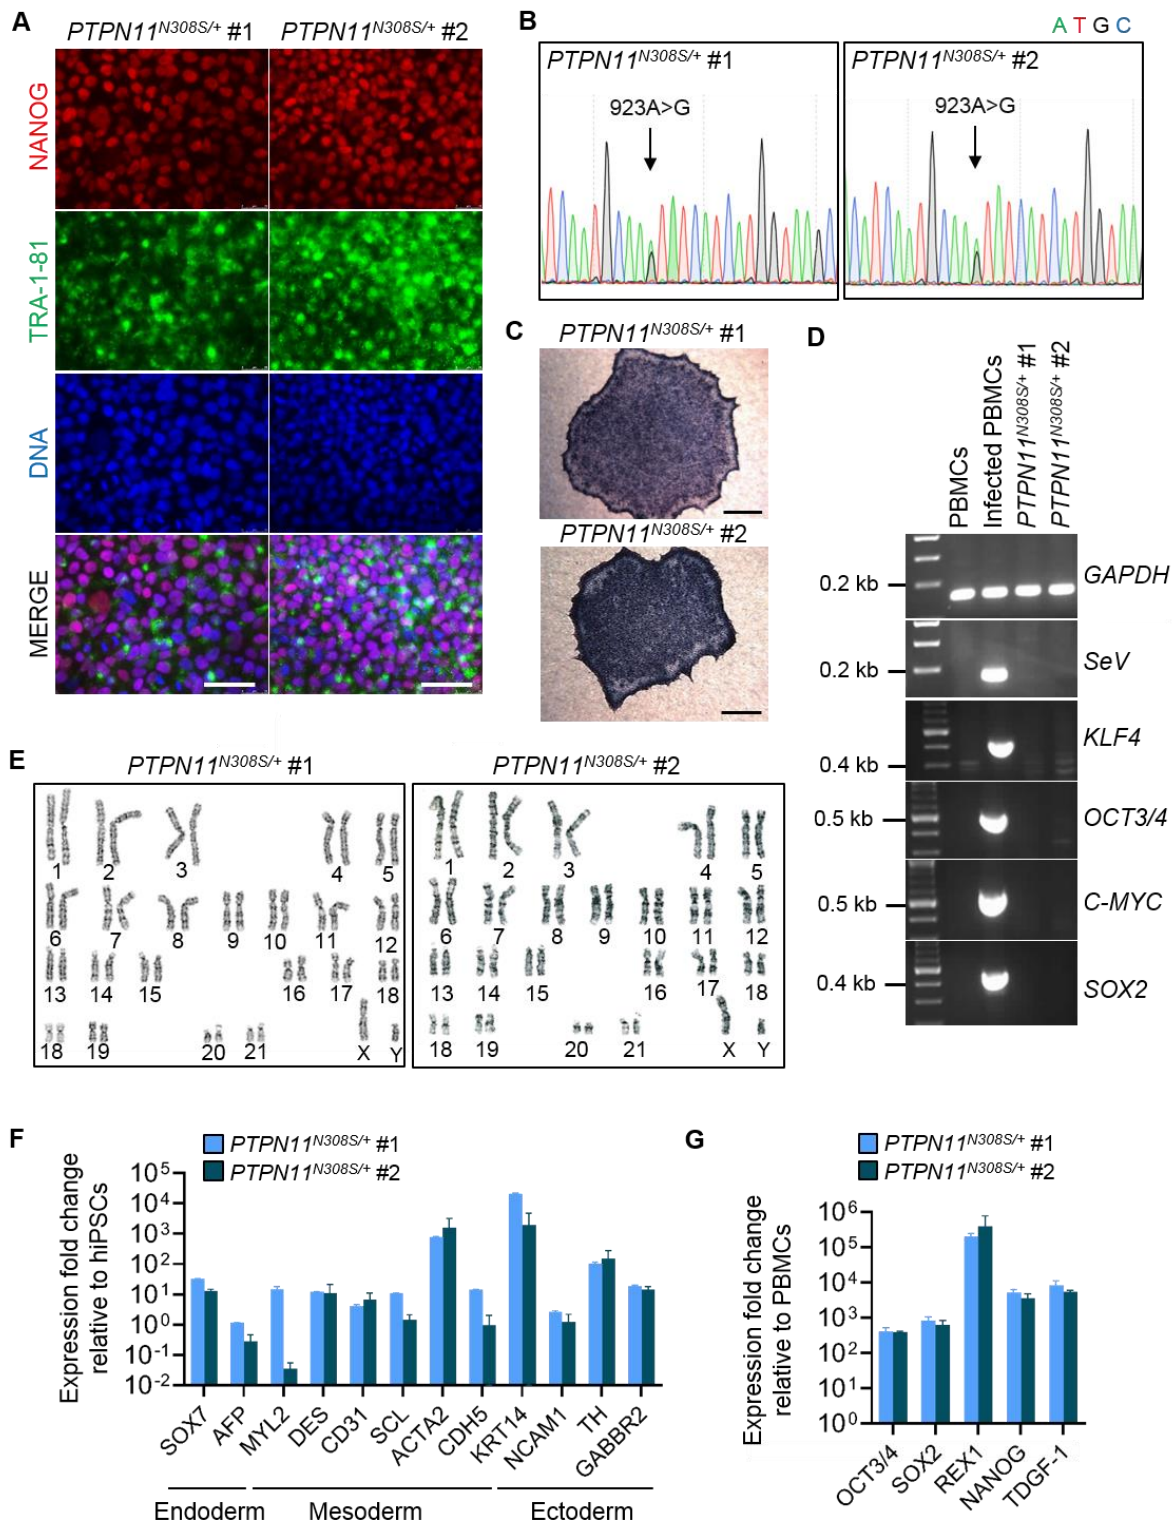

**Figure S11. Generation of NS-CM patient-derived *PTPN11*<sup>N308S/+</sup> iPSCs, Related to Figures 3 and 4.** (A) Immunofluorescence analysis of the pluripotency markers Nanog and TRA-1-81 in *PTPN11*<sup>N308S/+</sup> iPSCs (#1: passage 18; #2: passage 20). Scale bar = 50  $\mu$ m. (B) Sanger sequencing results of *PTPN11*<sup>N308S/+</sup> iPSCs confirming the presence of the heterozygous c.923A>G mutation in exon 8 of the *PTPN11* gene in both clones used in experiments (#1 and #2). (C) Bright field image of alkaline phosphatase staining performed on *PTPN11*<sup>N308S/+</sup> iPSC colonies (#1 and #2 both passage 6). Scale bar = 100  $\mu$ m. (D) RT-PCR analysis of the Sendai vector and viral transgenes *OCT4*, *SOX2*, *KLF4* and *c-MYC* in uninfected peripheral blood mononuclear cells (PBMCs, negative control), Sendai-infected PBMCs (positive control) and *PTPN11*<sup>N308S/+</sup> iPSCs, using *GAPDH* as an endogenous control (#1: passage 15; #2: passage 14). (E) Normal karyotype confirmed in *PTPN11*<sup>N308S/+</sup> iPSCs (#1: passage

38, #2: passage 27). **(F)** qRT-PCR analysis of markers of endoderm (*SOX7*, *AFP*), mesoderm (*MYL2*, *CD31*, *DES*, *SCL*, *ACTA2*, *CDH5*) and ectoderm (*KRT14*, *NCAM1*, *TH*, *GABRR2*) using *GAPDH* as an endogenous control after 21 days of spontaneous EB differentiation of *PTPN11*<sup>N308S/+</sup> iPSCs (#1: passage 25; #2: passage 22). The mean expression fold change relative to iPSCs is indicated as mean  $\pm$  SD, N = 2 differentiations. **(G)** qRT-PCR analysis of the pluripotency markers *OCT3/4*, *SOX2*, *NANOG*, *REX1* and *TDGF-1* using *GAPDH* as an endogenous control in *PTPN11*<sup>N308S/+</sup> iPSCs (#1: passage 15; #2: passage 14). The mean expression fold change relative to parental patient PBMCs is indicated as mean  $\pm$  SD, N = 2 differentiations.



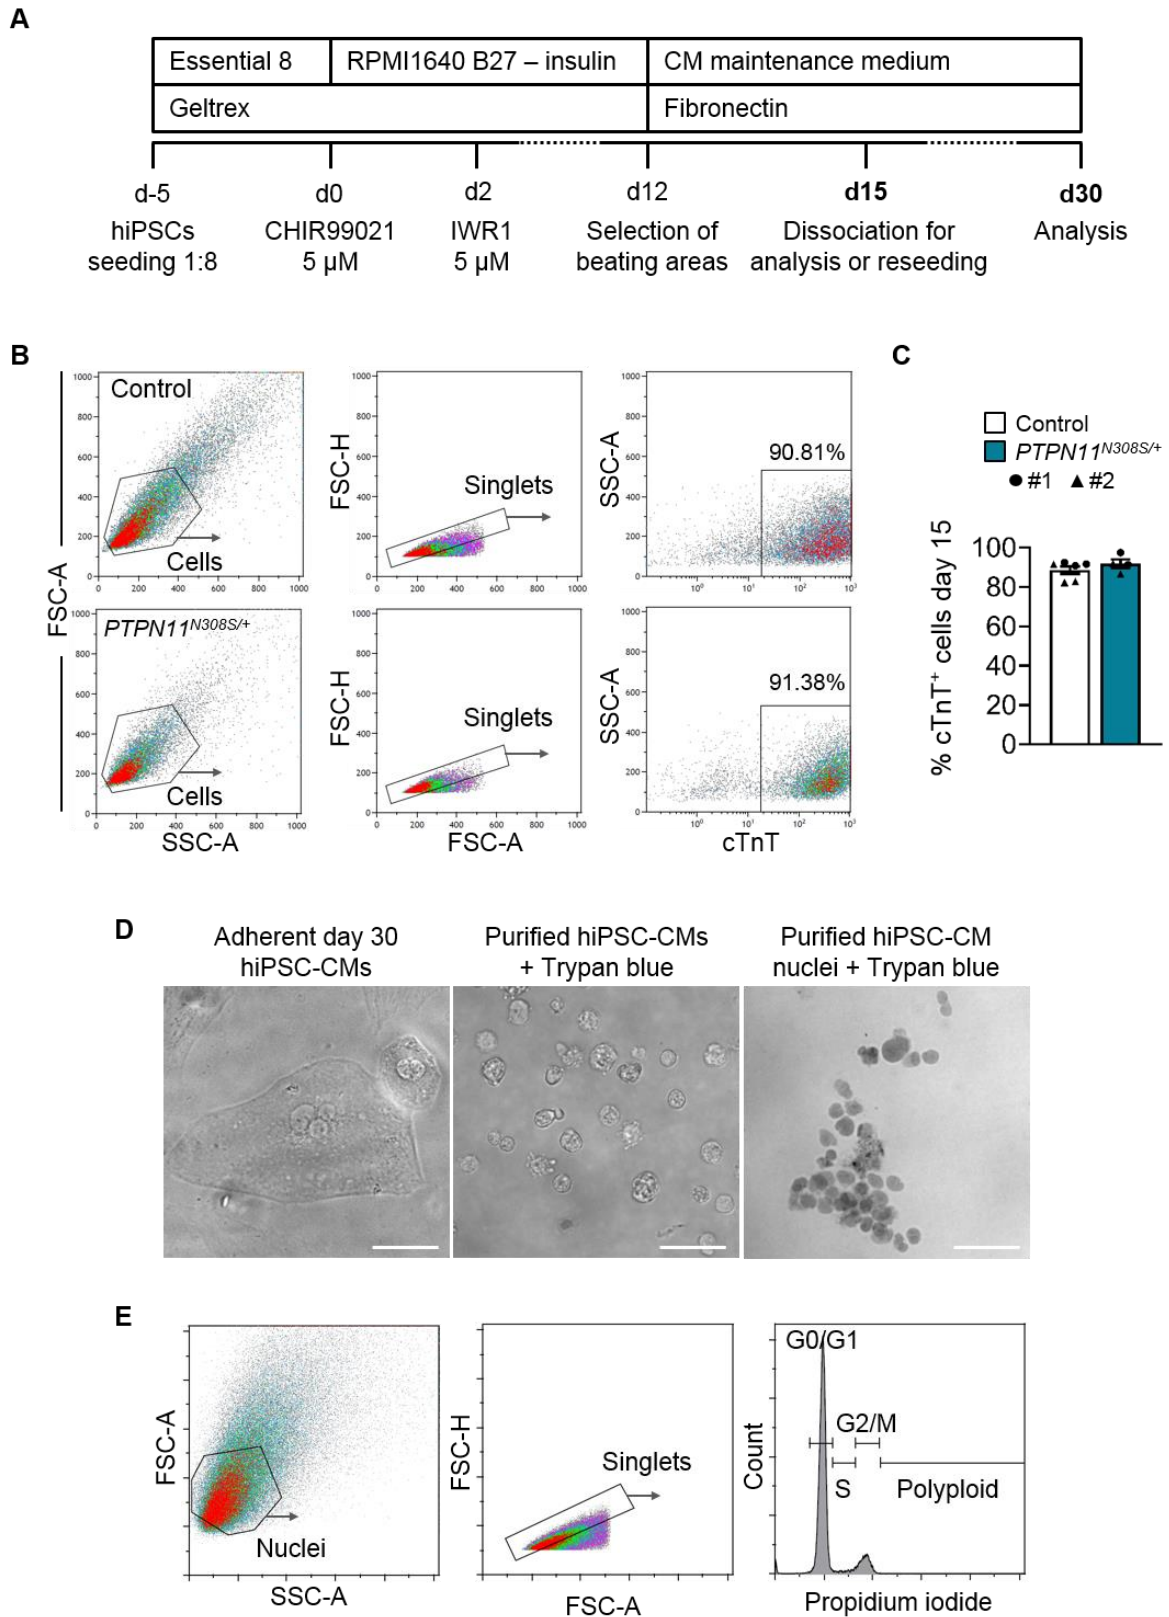

**Figure S12. Differentiation of iPSCs into cardiomyocytes and isolation of iPSC-CM nuclei for DNA content analysis, Related to STAR Methods and Figures 3 and 4. (A)** Graphical representation of the protocol used to differentiate iPSCs into cardiomyocytes (CMs) including media, basement coating and growth factors. Unless otherwise specified, iPSC-CMs were dissociated to single cells with papain and seeded at 25,000 cells/cm<sup>2</sup> at day 15 before analysis at day 30. **(B,C)** The efficiency of cardiac differentiation of control and *PTPN11*<sup>N308S/+</sup> iPSCs was assessed by flow cytometry analysis of cardiac troponin T (cTnT) in single cells (B). The percentage of cTnT<sup>+</sup> cells obtained at day 15 is indicated as



mean  $\pm$  SEM. Control #1 and #2 both N = 3 differentiations; *PTPN11*<sup>N308S/+</sup> #1 and #2 both N = 2 differentiations (C). FSC-A = forward scatter area, SSC-A = sideward scatter area, FSC-H = forward scatter height. **(D,E)** Representative images of day 30 iPSC-CMs before and after papain dissociation, purification and nuclei extraction. Trypan blue staining was used to verify nuclei yield and integrity (D). Gating strategy for the flow cytometry analysis of nuclei stained with propidium iodide to determine DNA content (G0/G1 phase: 2n; S phase: 2-4n; G2/M: 4n, polyploid: > 4n) (E). Scale bar in (D) = 50  $\mu$ m.

**Table S1. Clinical data of the NS-CM patients included in this study, Related to Figures 1 and 2**

|                                                                              | Patient 1              | Patient 2                    | Patient 3                                | Patient 4                     | Patient 5              | Patient 6                      | Patient 7     | Patient 8                               |
|------------------------------------------------------------------------------|------------------------|------------------------------|------------------------------------------|-------------------------------|------------------------|--------------------------------|---------------|-----------------------------------------|
| <b>Molecular genetic diagnosis</b>                                           |                        |                              |                                          |                               |                        |                                |               |                                         |
| Affected gene                                                                | <i>RAF1</i>            | <i>RAF1</i>                  | <i>RAF1</i>                              | <i>PTPN11</i>                 | <i>PTPN11</i>          | <i>RAF1</i>                    | <i>PTPN11</i> | <i>RAF1</i>                             |
| Nucleotide change                                                            | c.781C>T               | c.770C>T                     | c.775T>A                                 | c.1391G>C                     | c.923A>G               | c.770C>T                       | c.922A>G      | c.775T>A                                |
| Amino acid change                                                            | p.Pro261Ser            | p.Ser257Leu                  | p.Ser259Thr                              | p.Gly464Ala                   | p.Asn308Ser            | p.Ser257Leu                    | p.Asn308Asp   | p.Ser259Thr                             |
| Gender                                                                       | male                   | female                       | male                                     | female                        | male                   | female                         | male          | female                                  |
| Age at diagnosis (months)                                                    | early perinatal period | early perinatal period       | early perinatal period                   | early perinatal period        | early perinatal period | early perinatal period         | 24            | early perinatal period                  |
| Age at death (months)                                                        | na                     | na                           | na                                       | na                            | na                     | na                             | na            | 15                                      |
| <b>Clinical characteristics and cardiac pathology at the time of surgery</b> |                        |                              |                                          |                               |                        |                                |               |                                         |
| Age at surgery (months)                                                      | 165                    | 12                           | 11                                       | 13                            | 2                      | 34                             | 182           | 12                                      |
| Ross classification                                                          | III                    | III                          | IV                                       | III                           | IV                     | I                              | II            | I                                       |
| Medications                                                                  | none                   | beta-blocker (4.3 mg/kg/day) | beta-blocker (11.1 mg/kg/day); diuretics | beta-blocker (1.1 mg/kg/day); | none                   | beta-blocker (3.43 mg/kg/day); | none          | beta-blocker (9 mg/kg/day); disopyramid |
| TTE IVSd max (z-score)                                                       | 9.7                    | 5.6                          | 6.22                                     | 7.87                          | 5.2                    | 4.96                           | 5.05          | 6.7                                     |
| TTE LVPWd max (z-score)                                                      | 9.2                    | 5.95                         | 5.94                                     | 6.19                          | 7.3                    | 4.88                           | 4.9           | 7.1                                     |
| TTE LVEDd (z-score)                                                          | 0.5                    | -6.4                         | -3.4                                     | -4.9                          | -4.8                   | -0.5                           | -2.4          | -3.1                                    |
| LVOTO                                                                        | yes                    | yes                          | yes                                      | yes                           | Yes                    | yes                            | yes           | yes                                     |
| TTE peak LVOT gradient (mmHg)                                                | 130                    | 75                           | 130                                      | 72                            | 85                     | 92                             | 105           | 140                                     |
| RVOTO                                                                        | yes                    | no                           | no                                       | Yes                           | no                     | no                             | no            | yes                                     |
| TTE peak RVOT gradient (mmHg)                                                | 70                     | na                           | na                                       | 83                            | na                     | na                             | Na            | 36                                      |
| TTE EF (%)                                                                   | 74                     | 93                           | 95                                       | 80                            | 78                     | 98                             | 68            | 86                                      |
| Dilated left atrium                                                          | no                     | no                           | yes                                      | no                            | yes                    | no                             | no            | yes                                     |
| Mitral valve regurgitation                                                   | moderate               | mild                         | moderate                                 | No                            | mild                   | moderate                       | no            | moderate                                |
| Arrhythmias                                                                  | no                     | no                           | no                                       | no                            | no                     | no                             | no            | no                                      |
| <b>Histology</b>                                                             |                        |                              |                                          |                               |                        |                                |               |                                         |
| Fibrosis                                                                     | diffuse, 14%           | diffuse and patchy, 11%      | diffuse, 3%                              | diffuse and patchy, 6%        | focal, 2%              | na                             | diffuse, 3%   | na                                      |

| Myocyte disarray                                       | severe                                             | mild                                                | mild                                                          | severe            | moderate                                            | na                      | mild                        | na                                                                                                                            |
|--------------------------------------------------------|----------------------------------------------------|-----------------------------------------------------|---------------------------------------------------------------|-------------------|-----------------------------------------------------|-------------------------|-----------------------------|-------------------------------------------------------------------------------------------------------------------------------|
| <b>Cardiac pathology at the time of last follow-up</b> |                                                    |                                                     |                                                               |                   |                                                     |                         |                             |                                                                                                                               |
| Age at last follow-up (months)                         | 184                                                | 101                                                 | 96                                                            | na                | 109                                                 | 78                      | 220                         | na                                                                                                                            |
| Ross classification                                    | II                                                 | II                                                  | I                                                             | na                | I                                                   | I                       | II                          | na                                                                                                                            |
| Medications                                            | beta-blocker (0.8 mg/kg/day); diuretics; Amiodaron | beta-blocker (14 mg/kg/day), disopyramide           | beta-blocker (13 mg/kg/day), disopyramide                     | na                | none                                                | none                    | bisoprolol (0.12 mg/kg/day) | na                                                                                                                            |
| TTE IVSd max (z-score)                                 | 8.4                                                | 6.1                                                 | 7.8                                                           | na                | 0.15                                                | 3.6                     | 5.1                         | na                                                                                                                            |
| TTE LVPWd max (z-score)                                | 6.5                                                | 6.5                                                 | 6.4                                                           | na                | 1.4                                                 | 3.0                     | 2.5                         | na                                                                                                                            |
| TTE LVEDd (z-score)                                    | -1.2                                               | -3.1                                                | -9.1                                                          | na                | -1.9                                                | -5.1                    | 0.8                         | na                                                                                                                            |
| LVOTO                                                  | no                                                 | yes                                                 | no                                                            | na                | no                                                  | no                      | yes                         | na                                                                                                                            |
| TTE peak LVOT gradient (mmHg)                          | na                                                 | 40                                                  | na                                                            | na                | na                                                  | na                      | 30                          | na                                                                                                                            |
| RVOTO                                                  | yes                                                | no                                                  | no                                                            | na                | no                                                  | no                      | no                          | na                                                                                                                            |
| TTE peak RVOT gradient (mmHg)                          | 35                                                 | na                                                  | na                                                            | na                | na                                                  | na                      | na                          | na                                                                                                                            |
| TTE EF (%)                                             | 78                                                 | 89                                                  | 92                                                            | na                | 70                                                  | 72                      | 70                          | na                                                                                                                            |
| Dilated left atrium                                    | yes                                                | yes                                                 | no                                                            | na                | no                                                  | no                      | no                          | na                                                                                                                            |
| Mitral valve regurgitation                             | moderate                                           | no                                                  | no                                                            | na                | no                                                  | no                      | no                          | na                                                                                                                            |
| Arrhythmias                                            | yes                                                | no                                                  | no                                                            | na                | no                                                  | no                      | no                          | na                                                                                                                            |
| Clinical course                                        | no further intervention                            | second surgical septal myectomy at 63 months of age | right ventricular outflow tract resection at 96 months of age | lost to follow-up | second surgical septal myectomy at 76 months of age | no further intervention | no further intervention     | passed away from necrotizing enterocolitis, sepsis, and multiorgan failure after surgical septal myectomy at 15 months of age |

na: not applicable / not available; TTE: transthoracic echocardiography; IVSd: enddiastolic interventricular septal thickness; LVPWd: enddiastolic left ventricular posterior wall thickness; LVEDd: enddiastolic left ventricular diameter; LVOTO: left ventricular outflow tract obstruction; RVOTO; right ventricular outflow tract obstruction; EF: ejection fraction;

**Table S2. Characteristics of the LV myocardial tissue included in each assay, Related to Figures 1 and 2**

| Group                         | Affected gene                                                  | Genetic variant | Gender | Age at operation (years) | Assays                                  |
|-------------------------------|----------------------------------------------------------------|-----------------|--------|--------------------------|-----------------------------------------|
| NS-CM                         | <i>RAF1</i>                                                    | p.Pro261Ser     | male   | 13.75                    | Mant-ATP assay, Histopathology          |
|                               | <i>RAF1</i>                                                    | p.Ser257Leu     | female | 1                        | Mant-ATP assay, Histopathology, RNA-Seq |
|                               | <i>RAF1</i>                                                    | p.Ser259Thr     | male   | 0.9                      | Histopathology, RNA-Seq                 |
|                               | <i>PTPN11</i>                                                  | p.Gly464Ala     | female | 1.1                      | Mant-ATP assay, Histopathology          |
|                               | <i>PTPN11</i>                                                  | p.Asn308Ser     | male   | 0.2                      | Histopathology, RNA-Seq                 |
|                               | <i>RAF1</i>                                                    | p.Ser257Leu     | female | 2.8                      | RNA-Seq                                 |
|                               | <i>PTPN11</i>                                                  | p.Asn308Asp     | male   | 15.6                     | Mant-ATP assay, Histopathology, RNA-Seq |
| HCM                           | <i>RAF1</i>                                                    | p.Ser259Thr     | female | 1                        | Mant-ATP assay                          |
|                               | <i>MYH7</i>                                                    | p.R791W         | female | 40                       | Mant-ATP assay                          |
|                               | <i>MYH7</i>                                                    | p.R791Q         | male   | 38                       | Mant-ATP assay                          |
|                               | <i>MYBPC3</i>                                                  | p.Leu1200Pro    | male   | 16.1                     | Histopathology, RNA-Seq                 |
|                               | <i>MYH7</i>                                                    | p.Ile736Thr     | male   | 10.5                     | RNA-Seq                                 |
|                               | <i>MYBPC3</i>                                                  | p.Arg495Gln     | male   | 2.5                      | Histopathology                          |
|                               | <i>MYBPC3</i>                                                  | ND              | male   | 1.1                      | Histopathology                          |
|                               | <i>MYH7</i>                                                    | p.Arg403Trp     | female | 11.1                     | Histopathology                          |
|                               | Familial non-syndromic HCM (affected gene and variant unknown) |                 |        | male                     | 1.7                                     |
| Control (non-failing heart)   | NA                                                             |                 | female | 42                       | Mant-ATP assay                          |
|                               | NA                                                             |                 | male   | 38                       | Mant-ATP assay                          |
| Control (transplanted hearts) | NA                                                             |                 | female | 5                        | Histopathology                          |
|                               | NA                                                             |                 | male   | 1.3                      | Histopathology                          |
|                               | NA                                                             |                 | male   | 3                        | Histopathology                          |
|                               | NA                                                             |                 | female | 2                        | Histopathology                          |
|                               | NA                                                             |                 | male   | 1.75                     | Histopathology                          |
|                               | NA                                                             |                 | female | 4                        | Histopathology                          |
| Control (VSD)                 | NA                                                             |                 | male   | 0.5                      | RNA-Seq                                 |
|                               | NA                                                             |                 | female | 1.8                      | RNA-Seq                                 |
|                               | NA                                                             |                 | male   | 3.3                      | RNA-Seq                                 |
|                               | NA                                                             |                 | male   | 9.6                      | RNA-Seq                                 |

**Table S4. Top 20 genes upregulated in NS-CM tissue, Related to Figure 2.**  
(Log2 fold change in NS-CM and HCM tissue compared to control)

| Gene           | Group | Log2 fold change vs CTRL | P value (< 0.05 in bold) |
|----------------|-------|--------------------------|--------------------------|
| <i>EREG</i>    | NS-CM | 6.153                    | <b>0.01389</b>           |
|                | HCM   | 0.183                    | 0.22345                  |
| <i>CUX2</i>    | NS-CM | 5.226                    | <b>0.01125</b>           |
|                | HCM   | 2.018                    | <b>0.00009</b>           |
| <i>FGF10</i>   | NS-CM | 4.955                    | <b>0.01242</b>           |
|                | HCM   | 0.042                    | 0.66659                  |
| <i>MIR4701</i> | NS-CM | 4.831                    | <b>0.00469</b>           |
|                | HCM   | 0.083                    | 0.65029                  |
| <i>ATP1A4</i>  | NS-CM | 4.029                    | <b>0.01127</b>           |
|                | HCM   | 1.107                    | <b>0.00088</b>           |
| <i>NBPF24</i>  | NS-CM | 3.608                    | <b>0.04601</b>           |
|                | HCM   | 0.092                    | 0.66895                  |
| <i>NAT2</i>    | NS-CM | 3.459                    | <b>0.02271</b>           |

|                 |       |        |                |
|-----------------|-------|--------|----------------|
|                 | HCM   | 0.014  | 0.93911        |
| <i>GPR179</i>   | NS-CM | 3.428  | <b>0.04155</b> |
|                 | HCM   | 0.153  | 0.43051        |
| <i>LRRN4</i>    | NS-CM | 3.296  | <b>0.00994</b> |
|                 | HCM   | 0.197  | 0.37932        |
| <i>AK128707</i> | NS-CM | 3.173  | <b>0.00048</b> |
|                 | HCM   | 0.336  | 0.22754        |
| <i>U4</i>       | NS-CM | 3.160  | <b>0.02679</b> |
|                 | HCM   | -0.006 | 0.97074        |
| <i>SV2C</i>     | NS-CM | 3.104  | <b>0.00683</b> |
|                 | HCM   | 0.435  | 0.07454        |
| <i>AX747124</i> | NS-CM | 2.993  | <b>0.03589</b> |
|                 | HCM   | 0.615  | <b>0.04618</b> |
| <i>SYTL5</i>    | NS-CM | 2.987  | <b>0.00096</b> |
|                 | HCM   | 1.363  | <b>0.00001</b> |
| <i>SMCR5</i>    | NS-CM | 2.927  | <b>0.00282</b> |
|                 | HCM   | 0.021  | 0.92410        |
| <i>AK124399</i> | NS-CM | 2.882  | <b>0.03291</b> |
|                 | HCM   | -0.133 | 0.64960        |
| <i>AK094909</i> | NS-CM | 2.777  | <b>0.04208</b> |
|                 | HCM   | 0.146  | 0.45625        |
| <i>TMEM155</i>  | NS-CM | 2.747  | <b>0.00063</b> |
|                 | HCM   | -0.495 | 0.10181        |
| <i>KRT80</i>    | NS-CM | 2.687  | <b>0.00768</b> |
|                 | HCM   | 0.498  | 0.10015        |
| <i>MIR4257</i>  | NS-CM | 2.589  | <b>0.03774</b> |
|                 | HCM   | 0.065  | 0.75557        |

**Table S6. List of Antibodies, Related to STAR Methods**

| <b>Target</b>                        | <b>Host</b>       | <b>Reference</b>            | <b>Concentration</b> |
|--------------------------------------|-------------------|-----------------------------|----------------------|
| Nanog                                | Rabbit            | Abcam ab21624               | 1:500 (IF)           |
| TRA-1-81                             | Mouse             | BD Pharmingen 560174        | 1:20 (IF)            |
| Sendai virus                         | Rabbit            | MBL PD029                   | 1:1000 (IF)          |
| Cardiac troponin T                   | Mouse             | Invitrogen MA5-12960        | 1:500 (IF)           |
| Cardiac troponin T                   | Rabbit            | Abcam ab92546               | 1:500 (IF)           |
| Cardiac troponin T-VioBlue           | Recombinant human | Miltenyi Biotec 130-120-402 | 1:50 (FC)            |
| Plakophilin 2                        | Guinea pig        | Origene AP09554SU-N         | 1:100 (IF)           |
| Ki67                                 | Mouse             | BD Biosciences 556003       | 1:100 (IF)           |
| $\alpha$ -actinin                    | Mouse             | Sigma-Aldrich A7811         | 1:250 (IF)           |
| Dystrophin                           | Rabbit            | Zytomed 504-2664            | 1:1000 (IHC)         |
| Anti-mouse IgG Alexa Fluor 647       | Goat              | Invitrogen A-21235          | 1:500 (IF)           |
| Anti-guinea pig IgG Alexa Fluor A594 | Goat              | Invitrogen A-11076          | 1:500 (IF)           |
| Anti-rabbit IgG Alexa Fluor A488     | Goat              | Invitrogen A-11008          | 1:500 (IF)           |



**Table S7. List of Primer sequences, Related to STAR Methods**

| Name            | Use    | Sequence |                                 |
|-----------------|--------|----------|---------------------------------|
| Sendai Virus    | RT-PCR | Forward  | 5'GGATCACTAGGTGATATCGAGC        |
|                 |        | Reverse  | 5'ACCAGACAAGAGTTTAAGAGATATGTATC |
| Hs Sox2 trans   | RT-PCR | Forward  | 5'ATGCACCGCTACGACGTGAGCGC       |
|                 |        | Reverse  | 5'AATGTATCGAAGGTGCTCAA          |
| Hs Klf4 trans   | RT-PCR | Forward  | 5'TTCCTGCATGCCAGAGGAGCCC        |
|                 |        | Reverse  | 5'AATGTATCGAAGGTGCTCAA          |
| Hs c-Myc trans  | RT-PCR | Forward  | 5'TAACTGACTAGCAGGCTTGTCG        |
|                 |        | Reverse  | 5'AATGTATCGAAGGTGCTCAA          |
| Hs Oct3/4 trans | RT-PCR | Forward  | 5'CCCGAAAGAGAAAGCGAACCAG        |
|                 |        | Reverse  | 5'AATGTATCGAAGGTGCTCAA          |
| Hs ACTA2        | qPCR   | Forward  | 5'GTGATCACCATCGGAAATGAA         |
|                 |        | Reverse  | 5'TCATGATGCTGTTGTAGGTGGT        |
| Hs AFP          | qPCR   | Forward  | 5'GTGCCAAGCTCAGGGTGTAG          |
|                 |        | Reverse  | 5'CAGCCTCAAGTTGTTCTCTG          |
| Hs CD31         | qPCR   | Forward  | 5'ATGCCGTGGAAAGCAGATAC          |
|                 |        | Reverse  | 5'CTGTTCTTCTCGGAACATGGA         |
| Hs CDH5         | qPCR   | Forward  | 5'CCTACCAGCCCAAAGTGTGT          |
|                 |        | Reverse  | 5'TGTCCTTGCTATTGCGGAGA          |
| Hs DES          | qPCR   | Forward  | 5'GTGAAGATGGCCCTGGATGT          |
|                 |        | Reverse  | 5'TGGTTTCTCGGAAGTTGAGG          |
| Hs GABRR2       | qPCR   | Forward  | 5'CTGTGCCTGCCAGAGTTTCA          |
|                 |        | Reverse  | 5'ACGGCCTTGACGTAGGAGA           |
| Hs GAPDH        | qPCR   | Forward  | 5'TCCTCTGACTTCAACAGCGA          |
|                 |        | Reverse  | 5'GGGTCTTACTCCTTGAGGC           |
| Hs GATA4        | qPCR   | Forward  | 5'GGCCTGTCATCTCACTACGG          |
|                 |        | Reverse  | 5'ATGGCCAGACATCGCACT            |
| Hs KRT14        | qPCR   | Forward  | 5'CACCTCTCCTCCTCCCAGTT          |
|                 |        | Reverse  | 5'ATGACCTTGGTGCGGATTT           |
| Hs MYH6         | qPCR   | Forward  | 5'TCAGGATTCTCCGTGAAGGG          |
|                 |        | Reverse  | 5'CTCTTCCTTGTCATCGGGCA          |
| Hs MYH7         | qPCR   | Forward  | 5'TGTAGACACACTTGAGTAGCCC        |
|                 |        | Reverse  | 5'ACGGTCACTGTCTTGCCATA          |

|           |      |         |                             |
|-----------|------|---------|-----------------------------|
| Hs NANOG  | qPCR | Forward | 5'TGCAAGAACTCTCCAACATCCT    |
|           |      | Reverse | 5'ATTGCTATTCTTCGGCCAGTT     |
| Hs NCAM1  | qPCR | Forward | 5'CGACCATCCACCTCAAAGTC      |
|           |      | Reverse | 5'CCATGGCAGTCTGGTTCTCT      |
| Hs OCT4   | qPCR | Forward | 5'GACAGGGGGAGGGGAGGAGCTAGG  |
|           |      | Reverse | 5'CTTCCCTCCAACCAGTTGCCCAAAC |
| Hs REX1   | qPCR | Forward | 5'ACCAGCACACTAGGCAAACC      |
|           |      | Reverse | 5'TTCTGTTACACAGGCTCCA       |
| Hs SCL    | qPCR | Forward | 5'CCAACAATCGAGTGAAGAGGA     |
|           |      | Reverse | 5'CCGGCTGTTGGTGAAGATAC      |
| Hs SOX2   | qPCR | Forward | 5'GGGAAATGGGAGGGGTGCAAAGAGG |
|           |      | Reverse | 5'TTGCGTGAGTGTGGATGGATTGGTG |
| Hs SOX7   | qPCR | Forward | 5'TGAACGCCTTCATGGTTTG       |
|           |      | Reverse | 5'AGCGCCTTCCACGACTTT        |
| Hs TH     | qPCR | Forward | 5'TGTACTGGTTCACGGTGGAGT     |
|           |      | Reverse | 5'TCTCAGGCTCCTCAGACAGG      |
| Hs TDGF-1 | qPCR | Forward | 5'CCCAAGAAGTGTTCCCTGTG      |
|           |      | Reverse | 5'ACGTGCAGACGGTGGTAGTT      |
| Hs TNNT2  | qPCR | Forward | 5'AGCATCTATAACTTGGAGGCAGAG  |
|           |      | Reverse | 5'TGGAGACTTTCTGGTTATCGTTG   |
